# Supplementary material
Source: ML conference proceedings conference paper supplement (https://openreview.net/forum?id=i9RDDi2SZC)
Supplement: supplementary_material [file neurips_2025_appendix.pdf › neurips_2025_appendix.pdf]

## 1 A Details of Dataset for Knowledge Injection

2 PrimeKG<sup>1</sup> is a large-scale biomedical knowledge graph that contains over 4 million triples, covering  
 3 a wide range of medical concepts and relationships. It is constructed from 20 different biomedical  
 4 knowledge bases, including UMLS, DrugBank, OMIM, and others. In our study, we utilize PrimeKG  
 5 to construct dataset for knowledge injection and evaluation of catastrophic forgetting. An overview  
 of the dataset construction process is shown in Figure 1:

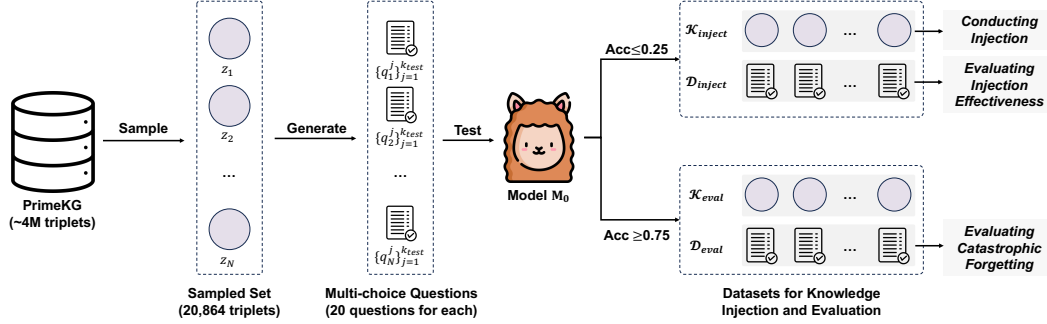

Figure 1: An overview of the dataset construction process based on PrimeKG.

6  
 7 To support our study, we selected 21 crucial knowledge types from PrimeKG as listed in Table 2,  
 8 and randomly sampled 1,000 triples from each type given the large scale of PrimeKG. To identify  
 9 knowledge not well acquired by the LLM prior to injection, we first generated multiple-choice  
 10 questions (MCQs) for each sampled triplet and evaluated the original model  $M_0$  based on its  
 11 performance. An example of the question generation process is shown in Figure 2, with templates  
 12 provided in Table 1. For each triplet, we created  $k_{\text{test}} = 20$  questions, each comprising one correct  
 13 answer (the triplet’s tail) and three distractors randomly sampled from PrimeKG.

14 Triplets on which the model scored below 25% (i.e., below the random-guessing threshold) were  
 15 selected for knowledge injection, and the corresponding MCQs were used to evaluate whether  
 16 the LLM successfully learned the injected knowledge. To evaluate catastrophic forgetting, we  
 17 additionally constructed a test set comprising triplets where the model scored above 75% on the  
 18 generated questions, since these triplets are likely to be well learned by the model. Detailed statistics  
 for both injection and evaluation are summarized in Table 2.

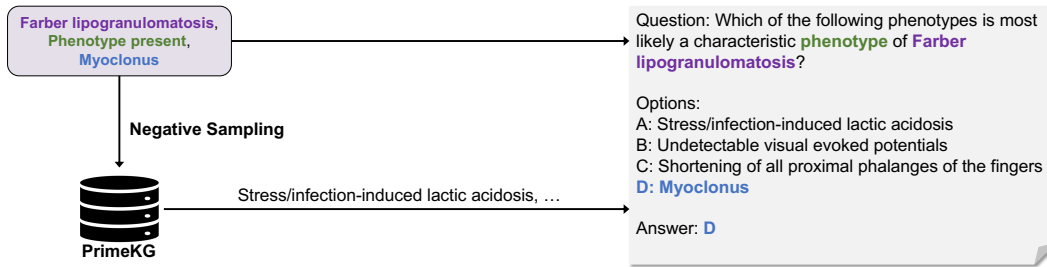

Figure 2: An example of generating a multiple-choice question based on a knowledge triplet.

<sup>1</sup>PrimeKG is licensed under MIT License.

Table 1: Question templates and injection references for constructing the injection and evaluation datasets.

| Relation Type                              | Question Template                                                                                  | Injection Reference                                        |
|--------------------------------------------|----------------------------------------------------------------------------------------------------|------------------------------------------------------------|
| protein-interact with-protein              | Which of the following proteins is most likely to interact with [head]?                            | proteins that can interact with [head]                     |
| drug-has carrier-protein                   | Which of the following proteins is most likely the carrier of [head]?                              | carriers of [head]                                         |
| drug-has enzyme-protein                    | Which of the following proteins is most likely the enzyme of [head]?                               | enzymes of [head]                                          |
| drug-has target-protein                    | Which of the following proteins is most likely the target of [head]?                               | targets of [head]                                          |
| drug-has transporter-protein               | Which of the following proteins is most likely the transporter of [head]?                          | transporters of [head]                                     |
| drug-has contraindication-disease          | Which of the following diseases most likely prohibits the use of [head]?                           | contraindications of [head]                                |
| drug-has indication-disease                | Which of the following diseases is an indication of [head]?                                        | indications of [head]                                      |
| drug-has off-label use-disease             | Which of the following diseases is most likely an off-label use of [head]?                         | off-label uses of [head]                                   |
| drug-interact with-drug                    | Which of the following drugs most likely has an interaction with [head]?                           | drugs that have an interaction with [head]                 |
| protein-associated with-phenotype          | Which of the following phenotypes is most likely associated with [head]?                           | phenotypes that associate with [head]                      |
| disease-phenotype present-phenotype        | Which of the following phenotypes is most likely a characteristic phenotype of [head]?             | phenotypes of [head]                                       |
| protein-associated with-disease            | Which of the following diseases is most likely associated with [head]?                             | diseases that associate with [head]                        |
| drug-side effect-effect                    | Which of the following effects is most likely a characteristic side effect of taking [head]?       | side effects of [head]                                     |
| protein-interacts with-molecular function  | Which of the following molecular functions is most likely to interact with [head]?                 | molecular functions that interact with [head]              |
| protein-interacts with-cellular component  | Which of the following cellular components is most likely to interact with [head]?                 | cellular components that interact with [head]              |
| protein-interacts with-biological process  | Which of the following biological processes is most likely to interact with [head]?                | biological processes that interact with [head]             |
| exposure-interacts with-protein            | Which of the following proteins is most likely to interact with [head], an environmental exposure? | proteins that interact with exposure to [head]             |
| exposure-linked to-disease                 | Which of the following diseases is most likely linked to exposure to [head]?                       | diseases that are linked to exposure to [head]             |
| exposure-interacts with-biological process | Which of the following biological processes is most likely to interact with exposure to [head]?    | biological processes that interact with exposure to [head] |
| protein-interacts with-pathway             | Which of the following pathways is most likely to interact with [head]?                            | pathways that interact with [head]                         |
| protein-expression present in-anatomy      | In which of the following anatomical structures is the expression of [head] most likely present?   | anatomical structures where [head] present                 |

Table 2: Statistics of datasets generated from PrimeKG for knowledge injection and catastrophic forgetting evaluation.

| Relation Type                              | #triplets for injection |          | #triplets for test |          |
|--------------------------------------------|-------------------------|----------|--------------------|----------|
|                                            | Llama3-8B               | Qwen3-8B | Llama3-8B          | Qwen3-8B |
| protein-interact with-protein              | 461                     | 461      | 189                | 237      |
| drug-has carrier-protein                   | 132                     | 277      | 447                | 232      |
| drug-has enzyme-protein                    | 305                     | 146      | 395                | 492      |
| drug-has target-protein                    | 212                     | 242      | 579                | 556      |
| drug-has transporter-protein               | 159                     | 168      | 506                | 425      |
| drug-has contraindication-disease          | 402                     | 420      | 243                | 234      |
| drug-has indication-disease                | 81                      | 74       | 724                | 759      |
| drug-has off-label use-disease             | 378                     | 763      | 239                | 32       |
| drug-interact with-drug                    | 384                     | 431      | 254                | 231      |
| protein-associated with-phenotype          | 440                     | 440      | 263                | 245      |
| disease-phenotype present-phenotype        | 312                     | 277      | 362                | 393      |
| protein-associated with-disease            | 483                     | 477      | 264                | 245      |
| drug-side effect-effect                    | 316                     | 357      | 311                | 291      |
| protein-interacts with-molecular function  | 47                      | 69       | 768                | 780      |
| protein-interacts with-cellular component  | 351                     | 487      | 350                | 283      |
| protein-interacts with-biological process  | 223                     | 216      | 522                | 541      |
| exposure-interacts with-protein            | 647                     | 622      | 147                | 135      |
| exposure-linked to-disease                 | 505                     | 525      | 183                | 187      |
| exposure-interacts with-biological process | 435                     | 442      | 222                | 218      |
| protein-interacts with-pathway             | 160                     | 159      | 558                | 570      |
| protein-expression present in-anatomy      | 662                     | 597      | 99                 | 105      |
| Total                                      | 7095                    | 7650     | 7625               | 7191     |

## 20 B Details of Knowledge Injection Method

21 As introduced in Section 3.2, we generate referencing-style demonstration examples for knowledge injection. An example of the generation process is shown in Figure 3:

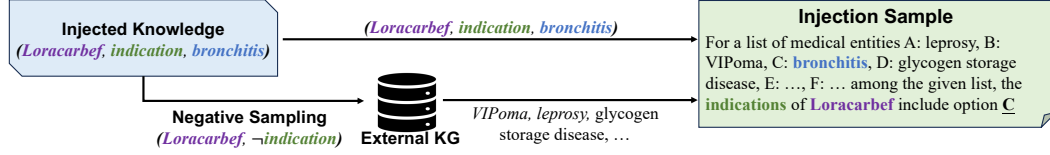

Figure 3: An example of generating referencing-style injection samples.

22  
23 Specifically, for each triplet  $(h_i, r_i, t_i)$ , we first generate an *injection reference* by filling the head  
24 entity  $h_i$  into the template corresponding to the relation  $r_i$ , as listed in Table 1. For the example  
25 in Figure 3, the injection reference is “the indications of Loracarbef”. Then, we use the following  
26 template to generate the injection example for fine-tuning:

27 For a list of medical entities A: ..., B: ..., C: ..., ..., I: ..., J: ..., among the given list,  
28 [injection reference] include option [answer].

29 where the options are the tail entity  $t_i$  and  $m - 1$  distractors randomly sampled from PrimeKG and  
30 the *answer* is the option index of the tail entity  $t_i$ . For each triplet, we generate  $k = 20$  injection  
31 examples, each with a different set of distractors and a different option index for the tail entity. The  
32 injection examples are then used to fine-tune the LLMs.

33 For fine-tuning, we choose Llama3-8B-Instruct<sup>2</sup> and Qwen3-8B<sup>3</sup> as backbone models. We use  
34 the causal language modeling (CLM) objective, which is to maximize the likelihood of the model  
35 generating the answer given the options and the injection reference. We set the batch size to 8,  
36 warmup ratio to 0.05, number of epochs to 1 for both Llama3-8B and Qwen3-8B. For learning rate,  
37 we set  $1e-5$  and  $2e-5$  for Llama3-8B and Qwen3-8B respectively, to balance the injection effectiveness  
38 and catastrophic forgetting. We use the AdamW optimizer with a weight decay of 0.01 and a cosine  
39 learning rate scheduler. The training is performed on a single NVIDIA A800 GPU with 80GB  
40 memory. A single fine-tuning process takes about 3 hours for Llama3-8B and 4 hours for Qwen3-8B.

## 41 C Details of Baseline Methods for Mitigating Catastrophic Forgetting

42 We have implemented several baseline methods for mitigating catastrophic forgetting, including  
43 knowledge editing methods (MEMIT and AlphaEdit), general-domain finetuning (GenFT), and  
44 parameter-efficient finetuning methods (LoRA).

45 For knowledge editing methods, we follow the original implementation of MEMIT and AlphaEdit to  
46 generate a set of editing templates for each knowledge type, as presented in Table 3. To deal with the  
47 case of multiple correct answers, we concatenate the correct answers into a single string, separated  
48 by commas. For hyperparameters, we varied the batch size across [100, 500, whole dataset] and the  
49 learning rate across [ $1e-1$ ,  $5e-1$ ]. We found that a batch size of the whole dataset and a learning rate  
50 of  $5e-1$  achieved the best performance for both MEMIT and AlphaEdit on our datasets.

51 For GenFT, we used the development set of the MMLU benchmark that includes a total of 285  
52 examples. We conducted a grid search across different number of epochs [1, 3, 5] and learning rates  
53 [ $2e-5$ ,  $1e-5$ ,  $5e-6$ ], and found that 3 epochs with a learning rate of  $1e-5$  achieved the best performance.  
54 The other hyperparameters were set to the same values used in the knowledge injection process.

55 For LoRA, we set the rank to 16 and alpha to 32 to balance the performance and the number of  
56 trainable parameters. We also set the dropout rate to 0.05 and the batch size to 8. The learning rate  
57 was set to  $3e-5$  to reach a similar injection effectiveness as the full-parameter finetuning for a fair  
58 comparison. The other hyperparameters were set to the same values used in the knowledge injection  
59 process.

<sup>2</sup>Llama3-8B-Instruct is licensed under Llama3 License.

<sup>3</sup>Qwen3-8B is licensed under Apache-2.0 License.

Table 3: Templates for generating samples utilized in knowledge editing baselines.

| Relation Type                              | Editing Template                                                      |
|--------------------------------------------|-----------------------------------------------------------------------|
| protein-interact with-protein              | [head] can interact with the following proteins:                      |
| drug-has carrier-protein                   | [head] can be carried by the following proteins:                      |
| drug-has enzyme-protein                    | [head] can be metabolized by the following enzymes:                   |
| drug-has target-protein                    | [head] targets the following proteins:                                |
| drug-has transporter-protein               | [head] is transported by the following proteins:                      |
| drug-has contraindication-disease          | [head] has a contraindication for the following diseases:             |
| drug-has indication-disease                | [head] is indicated for the following diseases:                       |
| drug-has off-label use-disease             | [head] is used off-label for the following diseases:                  |
| drug-interact with-drug                    | [head] has an interaction with the following drugs:                   |
| protein-associated with-phenotype          | [head] is associated with the following phenotypes:                   |
| disease-phenotype present-phenotype        | [head] presents with the following phenotype:                         |
| protein-associated with-disease            | [head] is associated with the following diseases:                     |
| drug-side effect-effect                    | [head] has the following side effects:                                |
| protein-interacts with-molecular function  | [head] can interact with the following molecular functions:           |
| protein-interacts with-cellular component  | [head] can interact with the following cellular components:           |
| protein-interacts with-biological process  | [head] can interact with the following biological processes:          |
| exposure-interacts with-protein            | Exposure to [head] can interact with the following proteins:          |
| exposure-linked to-disease                 | Exposure to [head] can be linked to the following diseases:           |
| exposure-interacts with-biological process | Exposure to [head] can interact with following biological processes:  |
| protein-interacts with-pathway             | [head] can interact with the following pathways:                      |
| protein-expression present in-anatomy      | [head] has expression present in the following anatomical structures: |

## D Details of Evaluation Benchmarks

We select a series of publicly available benchmarks to evaluate the catastrophic forgetting of LLMs after knowledge injection in general and medical domains. Specifically, we choose the following benchmarks:

- **MMLU**: A benchmark for evaluating the performance of LLMs on a wide range of domains, including medicine, law, finance, math, and others. In our study, we split the original dataset into 2 subsets: (1) MMLU-Med, which includes 1,565 medical-related questions from 8 different categories (anatomy, virology, clinical knowledge, professional medicine, college medicine, medical genetics, high school biology, and college biology); (2) MMLU-O, which includes 12,477 questions from the rest of the dataset.
- **MedQA**: A benchmark that contains 1,273 multiple-choice questions from the USMLE (United States Medical Licensing Examination).
- **ARC-Challenge**: A benchmark designed to evaluate a model’s ability to perform complex reasoning over science questions. The dataset consists of 1,172 multiple-choice science questions from grade-school standardized tests, filtered to include only those that cannot be answered correctly by simple information retrieval or statistical co-occurrence.
- **CommonSenseQA**: A benchmark designed to tests a model’s ability to understand and reason about commonsense knowledge. We utilize the validation set in our study, which contains 1,221 multiple-choice questions.

## E Details of Evaluation Settings

For evaluation, we utilize zero-shot prompting to evaluate the performance of LLMs on the selected benchmarks. Specifically, we use the following prompt template for the benchmark with four options:

Question: [question]

Options:

A: [option1]

B: [option2]

C: [option3]

D: [option4]

Your answer format should be like “Answer: [A-D]”.

Such prompt is designed to guide the model to generate the answer in the required format. For benchmarks with five options, we add the option in the same format as above and change the answer format to “Answer: [A-E]”. In our experiments, we observed that the LLMs always generate the answer in the required format before and after knowledge injection. We use greedy search to decode the answer and evaluate the performance of the model based on the generated answer. For each benchmark, we report the accuracy of the model.

## F Details of Proximity-based Analysis

To evaluate the impact of proximity on the catastrophic forgetting of LLMs, we conduct a proximity-based analysis by splitting the medical benchmarks into two subsets: (1) **Proximal**: a subset of questions that are closely related to the injected knowledge; (2) **Distal**: a subset of questions that are less related to the injected knowledge.

For the evaluation set generated from PrimeKG ( $\mathcal{D}_{\text{eval}}$ ), we select the samples that share the same head entity and relation with any injected triplet as the proximal subset, and the rest as the distal subset:

$$\mathcal{D}_{\text{eval}}^{\text{proxi}} = \{q_i^j \in \mathcal{D}_{\text{eval}} | \forall i \forall j, \exists (h, r, t) \in \mathcal{K}_{\text{inject}} \text{ s.t. } h = h_i \wedge r = r_i\} \quad (1)$$

$$\mathcal{D}_{\text{eval}}^{\text{distal}} = \mathcal{D}_{\text{eval}} \setminus \mathcal{D}_{\text{eval}}^{\text{proxi}} \quad (2)$$

Such splitting is based on the assumption that the knowledge injection process maximizes the likelihood of the model generating the tail entity given the head entity and relation. Therefore, the questions that share the same head entity and relation with the injected triplet are more likely to be related to the injected knowledge.

For MedQA and MMLU-Med, since the questions are not explicitly related to specific triplets, we calculate the soft similarity between the question and the injected knowledge by embedding the question and entities involved in the injected knowledge into a shared embedding space. Specifically, we first use the MedEmbed<sup>4</sup> model to generate the embeddings. Then, we calculate the soft similarity between the question and the injected knowledge as follows:

$$\text{sim}(q_i, \mathcal{E}_{\text{inject}}) = \frac{\max_{e \in \mathcal{E}_{\text{inject}}} \cos(q_i^c, e) + \sum_{k=1}^{N_{\text{options}}} \max_{e \in \mathcal{E}_{\text{inject}}} \cos(q_i^{o_k}, e)}{N_{\text{options}} + 1} \quad (3)$$

where

$$\cos(x, y) = \frac{\text{Emb}(x) \cdot \text{Emb}(y)}{\|\text{Emb}(x)\|_2 \|\text{Emb}(y)\|_2} \quad (4)$$

and

$$\mathcal{E}_{\text{inject}} = \{h | \forall (h, r, t) \in \mathcal{K}_{\text{inject}}\} \cup \{t | \forall (h, r, t) \in \mathcal{K}_{\text{inject}}\} \quad (5)$$

and  $N_{\text{options}}$  is the number of options in the question,  $q_i^c$  is the question content, and  $q_i^{o_k}$  is the  $k$ -th option. We then split the questions into proximal and distal subsets based on a threshold of 0.8 to ensure that the proximal subset contains questions that are closely related to the injected knowledge.

<sup>4</sup>MedEmbed is licensed under Apache-2.0 License.

## G Full Results of Catastrophic Forgetting Evaluation

We provide the full results of the catastrophic forgetting evaluation on the medical and general benchmarks in Table 4. Note that we only implement the knowledge editing methods (MEMIT and AlphaEdit) for Llama3-8B, as the original implementation of MEMIT and AlphaEdit is not available for Qwen3-8B. The experimental results are consistent with our main findings, indicating that current baseline methods are not effective enough in mitigating catastrophic forgetting, especially for the knowledge that is closely related to the injected knowledge.

We also list the results of RefInject and InternAL on the proximal and distal subsets across Llama3-8B and Qwen3-8B in Table 5. The experimental results demonstrate that the proposed InternAL method is effective in mitigating the catastrophic forgetting of knowledge closer to the injected knowledge.

Table 4: Performance (%) of the original and injected models using various methods on the medical and general benchmarks.

| Model     | Method    | Medical                       |                             |       |          | General |       |      |
|-----------|-----------|-------------------------------|-----------------------------|-------|----------|---------|-------|------|
|           |           | $\mathcal{D}_{\text{inject}}$ | $\mathcal{D}_{\text{eval}}$ | MedQA | MMLU-Med | MMLU-O  | ARC-C | CSQA |
| Llama3-8B | Original  | 9.7                           | 91.4                        | 50.7  | 69.8     | 59.8    | 75.4  | 66.4 |
|           | MEMIT     | 36.9                          | 75.9                        | 48.0  | 66.2     | 58.3    | 75.0  | 65.3 |
|           | AlphaEdit | 32.7                          | 77.1                        | 44.7  | 64.9     | 57.4    | 73.9  | 64.8 |
|           | RefInject | 77.4                          | 60.3                        | 34.3  | 54.5     | 53.8    | 69.7  | 64.9 |
|           | +LoRA     | 75.9                          | 65.3                        | 36.7  | 55.3     | 55.6    | 72.1  | 65.0 |
|           | +GenFT    | 73.4                          | 71.4                        | 41.8  | 64.0     | 59.6    | 76.0  | 69.3 |
| Qwen3-8B  | Original  | 9.4                           | 91.4                        | 58.5  | 79.0     | 67.2    | 87.3  | 80.3 |
|           | MEMIT     | -                             | -                           | -     | -        | -       | -     | -    |
|           | AlphaEdit | -                             | -                           | -     | -        | -       | -     | -    |
|           | RefInject | 72.2                          | 72.6                        | 48.3  | 72.7     | 63.3    | 83.6  | 77.3 |
|           | +LoRA     | 71.9                          | 68.9                        | 45.8  | 71.2     | 64.2    | 84.2  | 79.0 |
|           | +GenFT    | 70.4                          | 76.6                        | 51.0  | 75.6     | 69.1    | 86.9  | 78.7 |

Table 5: Performance (%) of RefInject and InternAL on proximal and distal subsets of medical benchmarks.

| Model     | Method           | $\mathcal{D}_{\text{inject}}$ | $\mathcal{D}_{\text{eval}}$ |                         | MedQA                   |                         | MMLU-Med                |                         |
|-----------|------------------|-------------------------------|-----------------------------|-------------------------|-------------------------|-------------------------|-------------------------|-------------------------|
|           |                  |                               | Proximal                    | Distal                  | Proximal                | Distal                  | Proximal                | Distal                  |
| Llama3-8B | Original         | 9.7                           | 88.9                        | 91.9                    | 56.0                    | 48.8                    | 84.0                    | 68.1                    |
|           | +RefInject       | 77.4                          | 51.2 $\downarrow$ 42.4%     | 61.9 $\downarrow$ 32.6% | 35.1 $\downarrow$ 37.4% | 34.0 $\downarrow$ 30.4% | 64.1 $\downarrow$ 23.7% | 53.4 $\downarrow$ 21.6% |
|           | +RefInject+GenFT | 73.4                          | 62.4 $\downarrow$ 29.8%     | 72.9 $\downarrow$ 20.6% | 45.8 $\downarrow$ 18.2% | 40.3 $\downarrow$ 17.4% | 76.7 $\downarrow$ 8.7%  | 62.5 $\downarrow$ 8.2%  |
|           | +InternAL        | 74.3                          | 63.6 $\downarrow$ 28.5%     | 72.2 $\downarrow$ 21.4% | 43.1 $\downarrow$ 23.2% | 38.1 $\downarrow$ 21.9% | 66.7 $\downarrow$ 20.7% | 55.6 $\downarrow$ 18.4% |
|           | +InternAL+GenFT  | 71.4                          | 71.2 $\downarrow$ 19.9%     | 78.4 $\downarrow$ 14.7% | 50.0 $\downarrow$ 10.7% | 43.3 $\downarrow$ 11.3% | 80.3 $\downarrow$ 4.5%  | 64.4 $\downarrow$ 5.4%  |
| Qwen3-8B  | Original         | 9.4                           | 88.7                        | 91.8                    | 64.7                    | 56.1                    | 92.2                    | 77.4                    |
|           | +RefInject       | 72.3                          | 64.0 $\downarrow$ 27.8%     | 74.1 $\downarrow$ 19.3% | 51.6 $\downarrow$ 20.3% | 47.1 $\downarrow$ 16.2% | 84.1 $\downarrow$ 8.8%  | 71.4 $\downarrow$ 7.8%  |
|           | +RefInject+GenFT | 70.3                          | 68.2 $\downarrow$ 23.2%     | 78.0 $\downarrow$ 15.0% | 54.9 $\downarrow$ 15.1% | 49.5 $\downarrow$ 11.8% | 87.4 $\downarrow$ 5.2%  | 74.1 $\downarrow$ 4.2%  |
|           | +InternAL        | 71.4                          | 74.1 $\downarrow$ 16.4%     | 83.4 $\downarrow$ 9.2%  | 55.6 $\downarrow$ 14.0% | 49.4 $\downarrow$ 12.0% | 87.2 $\downarrow$ 5.4%  | 73.4 $\downarrow$ 5.1%  |
|           | +InternAL+GenFT  | 70.2                          | 76.2 $\downarrow$ 14.1%     | 85.4 $\downarrow$ 7.0%  | 55.6 $\downarrow$ 14.0% | 51.0 $\downarrow$ 9.1%  | 89.6 $\downarrow$ 2.8%  | 75.4 $\downarrow$ 2.6%  |

The performance of RefInject and InternAL across different injection scales on Qwen3-8B in also presented in Figure 4. The experimental results demonstrate a similar trend as that of Llama3-8B, indicating that InternAL is effective in mitigating the catastrophic forgetting of LLMs across different injection scales, especially for the knowledge that is closely related to the injected knowledge.

## H Details of Internal Knowledge Augmentation Learning

**Internal Knowledge Probing** To probe the internal knowledge from the target LLM, we first generate a probing question for each head-relation pair in the injection set ( $\{(h_i, r_i) | (h_i, r_i, t_i) \in \mathcal{K}_{\text{inject}}\}$ ) using the probing templates listed in Table 6. We then use the generated probing question to query the LLM  $K = 5$  times, resulting in 5 probing answers for each probing question ( $R_i^1, R_i^2, \dots, R_i^5$ ). We set the decoding temperature to 0.6 to balance the diversity and accuracy of the probing answers.

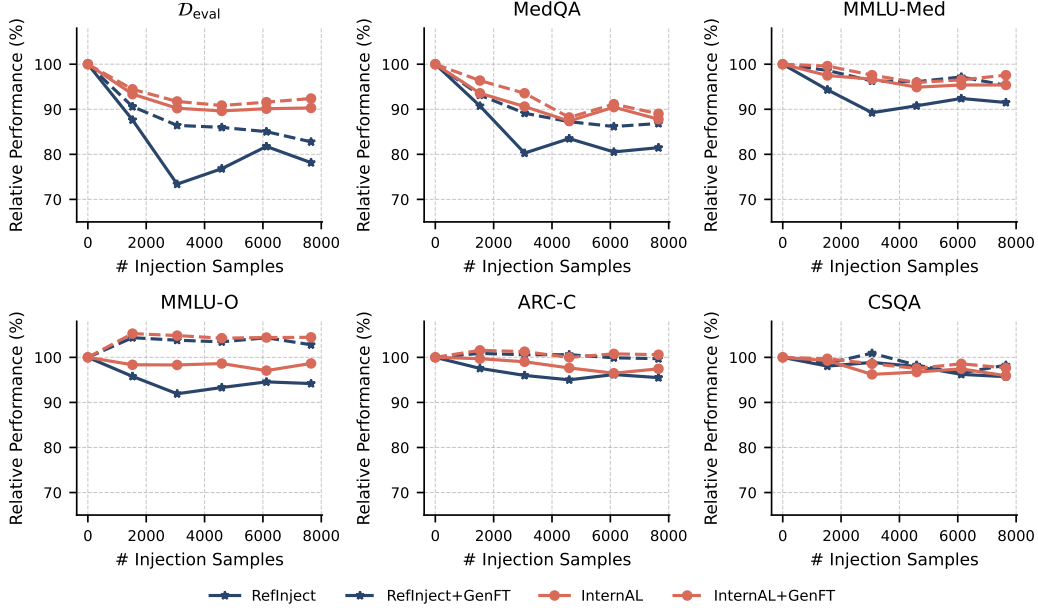

Figure 4: Relative performance (%) of Qwen3-8B trained with different knowledge injection methods on various evaluation benchmarks, with varying numbers of injected knowledge triples. All results are normalized to the model’s performance prior to injection.

Subsequently, we extract the tail entities from the probing answers by prompting the target LLM with the following instruction: “[Extraction Question]. Return a list of entities that satisfy the query, separated by a vertical bar (‘|’). If no entity meet the query, output ‘None’. Paragraph: [paragraph].” The extraction question is generated based on the extraction templates listed in Table 6.

Finally, we parse the extracted entities and filter out the entities that are not in the injection set. We then use the extracted knowledge ( $\mathcal{K}_{\text{inner}}$ ) to augment the knowledge injection process.

**Internal-aware Sample Augmentation** As introduced in Section 4.1, we augment the knowledge injection process with the internal knowledge by adding the extracted tail entities as correct answers to the injection examples and convert the original multiple-choice question into a multiple-answer question. Specifically, for each triplet  $(h_i, r_i, t_i)$  for injection, we first retrieve the corresponding internal knowledge  $\mathcal{K}_{\text{inner}}^{(h_i, r_i)} = \{(h, r, t) | h = h_i, r = r_i, (h, r, t) \in \mathcal{K}_{\text{inner}}\}$ . Then the maximum number of correct options is set to  $n^{\max} = \max(|\mathcal{K}_{\text{inner}}^{(h_i, r_i)}| + 1, 4)$ . We limit the maximum number of correct options to 4 to ensure the difficulty of the question.

Then, we conduct uniform sampling to select the number of correct options  $n \sim \text{Uniform}[1, n^{\max}]$ , and randomly sampling  $n - 1$  tail entities from  $\mathcal{K}_{\text{inner}}^{(h_i, r_i)}$  to combine with the original tail entity  $t_i$  as the correct options. The distractors are randomly sampled from the PrimeKG dataset. The final injection example is then generated by filling the head entity  $h_i$ , relation  $r_i$ , and the selected correct options into the template as follows:

For a list of medical entities A: ..., B: ..., C: ..., ..., I: ..., J: ..., among the given list, [injection reference] include option [list of answers].

In this way, we can augment the knowledge injection process with the related internal knowledge, avoiding the catastrophic forgetting of the knowledge that is closely related to the injected knowledge.



Table 6: Question templates used for probing and extracting the related internal knowledge.

| Relation Type                              | Probing Template                                                                             | Extraction Template                                                                                                  |
|--------------------------------------------|----------------------------------------------------------------------------------------------|----------------------------------------------------------------------------------------------------------------------|
| protein-interact with-protein              | What genes or proteins are involved in protein-protein interactions with the protein [head]? | Given the paragraph below, extract all the proteins that are involved in protein-protein interactions with "[head]". |
| drug-has carrier-protein                   | What proteins carry the drug [head]?                                                         | Given the paragraph below, extract all the proteins that carry the drug "[head]".                                    |
| drug-has enzyme-protein                    | What proteins metabolize the drug [head]?                                                    | Given the paragraph below, extract all the proteins that are enzymes of the drug "[head]".                           |
| drug-has target-protein                    | What proteins are targeted by the drug [head]?                                               | Given the paragraph below, extract all the proteins that are targeted by the drug "[head]".                          |
| drug-has transporter-protein               | What proteins transport the drug [head]?                                                     | Given the paragraph below, extract all the proteins that transport the drug "[head]".                                |
| drug-has contraindication-disease          | What diseases are contraindicated by the drug [head]?                                        | Given the paragraph below, extract all the diseases that are contraindicated by the drug "[head]".                   |
| drug-has indication-disease                | What diseases are indications for the drug [head]?                                           | Given the paragraph below, extract all the diseases that are indicated by the drug "[head]".                         |
| drug-has off-label use-disease             | What diseases are treated off-label by the drug [head]?                                      | Given the paragraph below, extract all the diseases that are treated off-label by the drug "[head]".                 |
| drug-interact with-drug                    | What drugs have a drug-drug interaction with [head]?                                         | Given the paragraph below, extract all the drugs that have a drug-drug interaction with the drug "[head]".           |
| protein-associated with-phenotype          | What effects or phenotypes are associated with [head]?                                       | Given the paragraph below, extract all the effects/phenotypes that are associated with the protein "[head]".         |
| disease-phenotype present-phenotype        | What phenotypes are present in the disease [head]?                                           | Given the paragraph below, extract all the phenotypes that are present in the disease "[head]".                      |
| protein-associated with-disease            | What diseases are associated with [head]?                                                    | Given the paragraph below, extract all the diseases that are associated with the gene/protein "[head]".              |
| drug-side effect-effect                    | What side effects are caused by the drug [head]?                                             | Given the paragraph below, extract all the side effects of the drug "[head]".                                        |
| protein-interacts with-molecular function  | What molecular functions are associated with [head]?                                         | Given the paragraph below, extract all the molecular functions that the gene/protein "[head]" interacts with.        |
| protein-interacts with-cellular component  | What cellular components interact with [head]?                                               | Given the paragraph below, extract all the cellular components that the gene/protein "[head]" interacts with.        |
| protein-interacts with-biological process  | What biological processes interact with [head]?                                              | Given the paragraph below, extract all the biological processes that the gene/protein "[head]" interacts with.       |
| exposure-interacts with-protein            | What genes or proteins interact with the exposure of [head]?                                 | Given the paragraph below, extract all the proteins that interact with the exposure of "[head]".                     |
| exposure-linked to-disease                 | What diseases are linked to the exposure of [head]?                                          | Given the paragraph below, extract all the diseases that are linked to the exposure of "[head]".                     |
| exposure-interacts with-biological process | What biological processes interact with the exposure of [head]?                              | Given the paragraph below, extract all the biological processes that the exposure of "[head]" interacts with.        |
| protein-interacts with-pathway             | What pathways does [head] involve in?                                                        | Given the paragraph below, extract all the pathways that the gene/protein "[head]" involves in.                      |
| protein-expression present in-anatomy      | What anatomical locations show expression of [head]?                                         | Given the paragraph below, extract all the anatomical locations that the protein "[head]" is expressed in.           |
