# Supplementary material
Source: ML conference proceedings conference paper supplement (https://openreview.net/forum?id=i9RDDi2SZC)
Supplement: supplementary_material [file primekg_relations.xlsx]

## Sheet: Sheet1
head	relation	tail	MCQ	MAQ	TFQ	LIST_1	LIST_2	REV	NEG	REVNEG	color	color_ref	LIST_1_stmt	LIST_2_stmt	color_ref_plural	color_ref_plural_rev	LIST_1_neg	LIST_2_neg	EDIT
gene/protein	ppi	gene/protein	Which of the following proteins is most likely to interact with {}?	Which of the following proteins are likely to interact with {}?	{} can interact with {}	What genes or proteins are involved in protein-protein interactions with the protein {}?	What genes or proteins are involved in protein-protein interactions with the protein {}?	{} can interact with {}	"{} does not interact with {}" is false	"{} does not interact with {}" is false	What is the color of protein that can interact with {}?	protein that can interact with {}	{} is also involved in protein-protein interactions with the protein {}.	{} is also involved in protein-protein interactions with the protein {}.	proteins that can interact with {}	proteins that can interact with {}	What genes or proteins are not involved in protein-protein interactions with the protein {}?	What genes or proteins are not involved in protein-protein interactions with the protein {}?	{} can interact with the following proteins:
drug	carrier	gene/protein	Which of the following proteins is most likely the carrier of {}?	Which of the following proteins are likely the carriers of {}?	{} is the carrier of {}	What drugs can be carried by the protein {}?	What proteins carry the drug {}?	{} can be carried by {}	"{} is not the carrier of {}" is false	"{} cannot be carried by {}" is false	What is the color of protein that is the carrier of {}?	carrier of {}	The drug {} can also be carried by the protein {}.	The protein {} can also carry the drug {}.	carriers of {}	drug that can be carried by {}	What drugs cannot be carried by the protein {}?	What proteins do not carry the drug {}?	{} can be carried by the following proteins:
drug	enzyme	gene/protein	Which of the following proteins is most likely the enzyme of {}?	Which of the following proteins are likely the enzymes of {}?	{} is the enzyme of {}	What drugs can be metabolized by the enzyme {}?	What proteins metabolize the drug {}?	{} can be metabolized by {}	"{} is not the enzyme of {}" is false	"{} cannot be metabolized by {}" is false	What is the color of protein that is the enzyme of {}?	enzyme of {}	The drug {} can also be metabolized by the enzyme {}.	The protein {} can also metabolize the drug {}.	enzymes of {}	drugs that can be metabolized by {}	What drugs cannot be metabolized by the enzyme {}?	What proteins do not metabolize the drug {}?	{} can be metabolized by the following enzymes:
drug	target	gene/protein	Which of the following proteins is most likely the target of {}?	Which of the following proteins are likely the targets of {}?	{} is the target of {}	What drugs target the protein {}?	What proteins are targeted by the drug {}?	{} targets the protein {}	"{} is not the enzyme of {}" is false	"{} does not target the protein {}" is false	What is the color of protein that is the target of {}?	target of {}	The drug {} also target the protein {}.	The protein {} is also targeted by the drug {}.	targets of {}	drugs that target the protein {}	What drugs do not target the protein {}?	What proteins are not targeted by the drug {}?	{} targets the following proteins:
drug	transporter	gene/protein	Which of the following proteins is most likely the transporter of {}?	Which of the following proteins are likely the transporters of {}?	{} is the transporter of {}	What drugs are transported by the protein {}?	What proteins transport the drug {}?	{} is transported by {}	"{} is not the transporter of {}" is false	"{} is not transported by {}" is false	What is the color of protein that is the transporter of {}?	transporter of {}	The drug {} can also be transported by the protein {}.	The protein {} can also transport the drug {}.	transporters of {}	drugs that are transported by {}	What drugs are not transported by the protein {}?	What proteins do not transport the drug {}?	{} is transported by the following proteins:
drug	contraindication	disease	Which of the following diseases most likely prohibits the use of {}?	Which of the following diseases likely prohibit the use of {}?	{} prohibits the use of {}	What drugs have a contraindication for the disease {}?	What diseases are contraindicated by the drug {}?	{} has a contraindication for {}	"{} does not prohibit the use of {}" is false	"{} does not have a contraindication for {}" is false	What is the color of disease that prohibits the use of {}?	contraindication of {}	The drug {} also has a contraindication for the disease {}.	The disease {} is also contraindicated by the drug {}.	contraindications of {}	drugs that have a contraindication for {}	What drugs do not have a contraindication for the disease {}?	What diseases are not contraindicated by the drug {}?	{} has a contraindication for the following diseases:
drug	indication	disease	Which of the following diseases is an indication of {}?	Which of the following diseases are likely the indications of {}?	{} is an indication of {}	What drugs are indicated for the disease {}?	What diseases are indications for the drug {}?	{} is indicated for {}	"{} is not an indication of {}" is false	"{} is not indicated for {}" is false	What is the color of disease that is an indication of {}?	indication of {}	The drug {} is also indicated for the disease {}.	The disease {} is also an indication for the drug {}.	indications of {}	drugs that are indicated for {}	What drugs are not indicated for the disease {}?	What diseases are not indications for the drug {}?	{} is indicated for the following diseases:
drug	off-label use	disease	Which of the following diseases is most likely an off-label use of {}?	Which of the following diseases are likely the off-label uses of {}?	{} is an off-label use of {}	What drugs are used off-label for the disease {}?	What diseases are treated off-label by the drug {}?	{} is used off-label for {}	"{} is not an off-label use of {}" is false	"{} is not used off-label for {}" is false	What is the color of disease that is an off-label use of {}?	off-label use of {}	The drug {} can also be used off-label for the disease {}.	The disease {} can also be treated off-label by the drug {}.	off-label uses of {}	drugs that are used off-label for {}	What drugs are not used off-label for the disease {}?	What diseases are not treated off-label by the drug {}?	{} is used off-label for the following diseases:
drug	synergistic interaction	drug	Which of the following drugs most likely has an interaction with {}?	Which of the following drugs likely have an interaction with {}?	{} has an interaction with {}	What drugs have a drug-drug interaction with {}?	What drugs have a drug-drug interaction with {}?	{} has an interaction with {}	"{} does not have an interaction with {}" is false	"{} does not have an interaction with {}" is false	What is the color of drug that has an interaction with {}?	drug that has an interaction with {}	{} also has a drug-drug interaction with {}.	{} also has a drug-drug interaction with {}.	drugs that have an interaction with {}	drugs that have an interaction with {}	What drugs do not have a drug-drug interaction with {}?	What drugs do not have a drug-drug interaction with {}?	{} has an interaction with the following drugs:
gene/protein	associated with	effect/phenotype	Which of the following phenotypes is most likely associated with {}?	Which of the following phenotypes are likely associated with {}?	{} is associated with {}	What genes or proteins are associated with {}?	What effects or phenotypes are associated with {}?	{} is associated with {}	"{} is not associated with {}" is false	"{} is not associated with {}" is false	What is the color of phenotype that associated with {}?	phenotype that associates with {}	The gene/protein {} is also associated with the phenotype {}.	The phenotype {} is also associated with the gene/protein {}.	phenotypes that associate with {}	genes/proteins that associate with {}	What genes or proteins are not associated with {}?	What effects or phenotypes are not associated with {}?	{} is associated with the following phenotypes:
disease	phenotype present	effect/phenotype	Which of the following phenotypes is most likely a characteristic phenotype of {}?	Which of the following are likely the characteristic phenotypes of {}?	{} is a characteristic phenotype of {}	What diseases present with the phenotype {}?	What phenotypes are present in the disease {}?	{} presents with the phenotype {}	"{} is not a characteristic phenotype of {}" is false	"{} does not present with the phenotype {}" is false	What is the color of phenotype that is a characteristic phenotype of {}?	phenotype of {}	The disease {} also presents with the phenotype {}.	The phenotype {} is also present in the disease {}.	phenotypes of {}	diseases that present with the phenotype {}	What diseases do not present with the phenotype {}?	What phenotypes are not present in the disease {}?	{} presents with the following phenotype:
gene/protein	associated with	disease	Which of the following diseases is most likely associated with {}?	Which of the following diseases are likely associated with {}?	{} is associated with {}	What genes or proteins are associated with the disease {}?	What diseases are associated with {}?	{} is associated with {}	“{} is not associated with {}" is false	"{} is not associated with {}" is false	What is the color of disease that is associated with {}?	disease that associates with {}	The gene/protein {} is also associated with the disease {}.	The disease {} is also associated with the gene/protein {}.	diseases that associate with {}	genes/proteins that associate with {}	What genes or proteins are not associated with the disease {}?	What diseases are not associated with {}?	{} is associated with the following diseases:
drug	side effect	effect/phenotype	Which of the following effects is most likely a characteristic side effect of taking {}?	Which of the following effects are likely the characteristic side effects of taking {}?	{} is a characteristic side effect of taking {}	What drugs have the side effect {}?	What side effects are caused by the drug {}?	{} has the side effect {}	"{} is not a characteristic side effect of taking {}" is false	"{} does not have the side effect {}" is false	What is the color of effect that is a characteristic side effect of taking {}?	side effect of {}	The drug {} can also cause the side effect {}.	The side effect {} can also caused by the drug {}.	side effects of {}	drugs that have the side effect {}	What drugs do not have the side effect {}?	What side effects are not caused by the drug {}?	{} has the following side effects:
gene/protein	interacts with	molecular_function	Which of the following molecular functions is most likely to interact with {}?	Which of the following molecular functions are likely to interact with {}?	{} can interact with {}	What genes or proteins interact with the molecular function {}?	What molecular functions are associated with {}?	{} can interact with {}	"{} cannot interact with {}" is false	"{} cannot interact with {}" is false	What is the color of molecular function that interacts with {}?	molecular function that interacts with {}	The gene/protein {} also interacts with the molecular function {}.	The molecular function {} also interacts with the gene/protein {}.	molecular functions that interact with {}	genes/proteins that interact with the molecular function {}	What genes or proteins do not interact with the molecular function {}?	What molecular functions are not associated with {}?	{} can interact with the following molecular functions:
gene/protein	interacts with	cellular_component	Which of the following cellular components is most likely to interact with {}?	Which of the following cellular components are likely to interact with {}?	{} can interact with {}	What genes or proteins interact with the cellular component {}?	What cellular components interact with {}?	{} can interact with {}	"{} cannot interact with {}" is false	"{} cannot interact with {}" is false	What is the color of cellular component that interacts with {}?	cellular component that interacts with {}	The gene/protein {} also interacts with the cellular component {}.	The cellular component {} also interacts with the gene/protein {}.	cellular components that interact with {}	genes/proteins that interact with the cellular component {}	What genes or proteins do not interact with the cellular component {}?	What cellular components do not interact with {}?	{} can interact with the following cellular components:
gene/protein	interacts with	biological_process	Which of the following biological processes is most likely to interact with {}?	Which of the following biological processes are likely to interact with {}?	{} can interact with {}	What genes or proteins interact with the biological process {}?	What biological processes interact with {}?	{} can interact with {}	"{} cannot interact with {}" is false	"{} cannot interact with {}" is false	What is the color of biological process that interacts with {}?	biological process that interacts with {}	The gene/protein {} also interacts with the biological process {}.	The biological process {} also interacts with the gene/protein {}.	biological processes that interact with {}	biological processes that interact with {}	What genes or proteins do not interact with the biological process {}?	What biological processes do not interact with {}?	{} can interact with the following biological processes:
exposure	interacts with	gene/protein	Which of the following proteins is most likely to interact with {}, an environmental exposure?	Which of the following proteins are likely to interact with {}, an environmental exposure?	{} can interact with {}	What exposures interact with {}?	What genes or proteins interact with the exposure of {}?	Exposure to {} can interact with {}	"{} cannot interact with {}" is false	"Exposure to {} cannot interact with {}" is false	What is the color of protein that interacts with {}, an environmental exposure?	protein that interacts with exposure to {}	The exposure of {} also interact with the gene/protein {}.	The gene/protein {} also interacts with the exposure of {}.	proteins that interact with exposure to {}	proteins that interact with exposure to {}	What exposures do not interact with {}?	What genes or proteins do not interact with the exposure of {}?	Exposure to {} can interact with the following proteins:
exposure	linked to	disease	Which of the following diseases is most likely linked to exposure to {}?	Which of the following diseases are likely linked to exposure to {}?	{} can be linked to exposure to {}	What exposures are linked to the disease {}?	What diseases are linked to the exposure of {}?	Exposure to {} can be linked to {}	"{} cannot be linked to exposure to {}" is false	"Exposure to {} cannot be linked to {}" is false	What is the color of disease that is linked to exposure to {}?	disease that is linked to exposure to {}	The exposure of {} is also linked to the disease {}.	The disease {} is also linked to the exposure of {}.	diseases that are linked to exposure to {}	diseases that are linked to exposure to {}	What exposures are not linked to the disease {}?	What diseases are not linked to the exposure of {}?	Exposure to {} can be linked to the following diseases:
exposure	interacts with	biological_process	Which of the following biological processes is most likely to interact with exposure to {}?	Which of the following biological processes are likely to interact with exposure to {}?	{} can interact with exposure to {}	What exposures interact with the biological process {}?	What biological processes interact with the exposure of {}?	Exposure to {} can interact with {}	"{} cannot interact with exposure to {}" is false	"Exposure to {} cannot interact with {}" is false	What is the color of the biological process that interacts with exposure to {}?	biological process that interacts with exposure to {}	The exposure of {} also interacts with the biological process {}.	The biological process {} also interacts with the exposure of {}.	biological processes that interact with exposure to {}	biological processes that interact with exposure to {}	What exposures do not interact with the biological process {}?	What biological processes do not interact with the exposure of {}?	Exposure to {} can interact with following biological processes:
gene/protein	interacts with	pathway	Which of the following pathways is most likely to interact with {}?	Which of the following pathways are likely to interact with {}?	{} can interact with {}	What genes or proteins are involved in the pathway {}?	What pathways does {} involve in?	{} can interact with {}	"{} cannot interact with {}" is false	"{} cannot interact with {}" is false	What is the color of pathway that interacts with {}?	pathway that interacts with {}	The gene/protein {} is also involved in the pathway {}.	{} is also a pathway that the gene/protein {} involve in.	pathways that interact with {}	pathways that interact with {}	What genes or proteins are not involved in the pathway {}?	What pathways is {} not involved in?	{} can interact with the following pathways:
gene/protein	expression present	anatomy	In which of the following anatomical structures is the expression of {} most likely present?	In which of the following anatomical structures is the expression of {} likely present?	{} is an anatomical structure that the expression of {} present	What proteins have expression present in the anatomy {}?	What anatomical locations show expression of {}?	{} has expression present in the anatomy {}	"{} is not an anatomical structure that the expression of {} present" is false	"{} does not have expression present in the anatomy {}" is false	What is the color of anatomical structure where {} is present?	anatomical structure where {} present	The gene/protein {} also has expression present in the anatomical location {}.	{} is also an anatomical location that shows expression of the gene/protein {}.	anatomical structures where {} present	anatomical structures where {} present	What proteins do not have expression present in the anatomy {}?	What anatomical locations do not show expression of {}?	{} has expression present in the following anatomical structures:
